# Supplementary material for: Applying the Plan-Do-Study-Act cycle in medical education to refine an antibiotics therapy active learning session
Source: PubMed Central journal article supplement (PMC8404352; doi:10.1186/s12909-021-02886-3), 2021-08-30
Supplement: 12909_2021_2886_MOESM1_ESM.pdf [file 12909_2021_2886_MOESM1_ESM.pdf]

| Class                                                     | Example(s)                                                                        | Mechanism of action                                                                                                                                                             | Spectrum                                                                                                                                                                                                                                                                                                                                                  | Side effects / Notes                                                                                                                                                                                                                                                             |
|-----------------------------------------------------------|-----------------------------------------------------------------------------------|---------------------------------------------------------------------------------------------------------------------------------------------------------------------------------|-----------------------------------------------------------------------------------------------------------------------------------------------------------------------------------------------------------------------------------------------------------------------------------------------------------------------------------------------------------|----------------------------------------------------------------------------------------------------------------------------------------------------------------------------------------------------------------------------------------------------------------------------------|
| <b>BETA-LACTAMS</b>                                       |                                                                                   |                                                                                                                                                                                 |                                                                                                                                                                                                                                                                                                                                                           |                                                                                                                                                                                                                                                                                  |
| <b>PENICILLINS</b>                                        |                                                                                   |                                                                                                                                                                                 |                                                                                                                                                                                                                                                                                                                                                           |                                                                                                                                                                                                                                                                                  |
| Natural Penicillins                                       | PCN G<br>PCN VK (oral)                                                            | all beta lactam antibiotics bind penicillin-binding-proteins (PBP's) to inhibit bacterial cell wall synthesis<br><br>NOTE: antimicrobial effect depends on <i>time over MIC</i> | GPC (streptococci, enterococci, PCN-S staph)<br><br><i>N. meningitidis</i><br><i>T. pallidum</i> (syphilis)<br>Actinomycosis                                                                                                                                                                                                                              | Allergy / rash<br>GI intolerance including <i>C diff</i><br>Neurologic (encephalopathy / seizure)<br>immune-mediated cytopenias<br>JH reaction (when treating syphilis)<br>(NOTE: these apply to all beta-lactams - additional / idiosyncratic SE's listed for each class below) |
| Penicillinase-resistant (anti-staphylococcal) Penicillins | Nafcillin<br>Oxacillin                                                            |                                                                                                                                                                                 | MSSA                                                                                                                                                                                                                                                                                                                                                      | interstitial nephritis (nafcillin)<br>hepatitis (oxacillin)                                                                                                                                                                                                                      |
| Aminopenicillins                                          | Amoxicillin (oral)<br>Ampicillin (IV)                                             |                                                                                                                                                                                 | similar to natural penicillins but better gram neg coverage (e.g. <i>H. flu</i> , <i>E. coli</i> )                                                                                                                                                                                                                                                        | rash (idiosyncratic with EBV)                                                                                                                                                                                                                                                    |
| Anti-Pseudomonal Penicillins                              | Ticarcillin<br>Piperacillin                                                       |                                                                                                                                                                                 | improved gram negative coverage including <i>Pseudomonas</i> and anaerobes (e.g. <i>Bacteriodes fragilis</i> )                                                                                                                                                                                                                                            | leukopenia and thrombocytopenia including bleeding diathesis (rare)<br>interstitial nephritis<br>hepatitis                                                                                                                                                                       |
| <b>CEPHALOSPORINS</b>                                     |                                                                                   |                                                                                                                                                                                 |                                                                                                                                                                                                                                                                                                                                                           |                                                                                                                                                                                                                                                                                  |
| General information                                       | see below for each generation                                                     | all beta lactam antibiotics bind penicillin-binding-proteins (PBP's) to inhibit bacterial cell wall synthesis<br><br>NOTE: antimicrobial effect depends on <i>time over MIC</i> | rule of thumb: successive generations have increasing gram neg and decreasing gram pos coverage; enterococci are intrinsically resistant to cephalosporins                                                                                                                                                                                                | usually well-tolerated even in persons with reported PCN allergy<br><br>SE profile similar to PCN's: allergic reactions (often with eosinophilia), hepatitis, cytopenias, and CNS effects (confusion, seizures)                                                                  |
| 1st gen                                                   | Cephalexin (oral)<br>Cefazolin (IV)                                               |                                                                                                                                                                                 | Primarily gram positives e.g. MSSA, streptococci<br>Some aerobic gram neg e.g. <i>E. coli</i> , <i>Klebsiella</i><br>Poor anaerobic coverage                                                                                                                                                                                                              |                                                                                                                                                                                                                                                                                  |
| 2nd gen                                                   | Cefuroxime (oral)<br>Cefotetan<br>Cefoxitin                                       |                                                                                                                                                                                 | still some activity vs. gram positives but used more commonly for gram neg aerobes ( <i>H. flu</i> ; <i>Moraxella</i> ; <i>E. Coli</i> )<br>Cefotetan and Cefoxitin are active against <i>Bacterioides fragilis</i> but resistance is increasing                                                                                                          | Disulfiram-like reaction with ETOH (cefotetan)                                                                                                                                                                                                                                   |
| 3rd gen                                                   | Cefdinir (oral)<br>Cefpodoxime (oral)<br>Cefotaxime<br>Ceftazidime<br>Ceftriaxone |                                                                                                                                                                                 | enhanced gram neg coverage due to beta-lactamase stability<br>less activity against gram positives BUT cefotaxime and ceftriaxone remain active vs. <i>S. pneumo</i><br>good CSF penetration<br>Ceftazidime active vs. <i>Pseudomonas</i><br>Common uses: <i>N. meningitidis</i> ; <i>N. gonorrhoea</i> ; <i>S. pneumo</i> ;<br><i>Enterobacteriaceae</i> | biliary sludge (ceftriaxone)                                                                                                                                                                                                                                                     |
| 4th gen                                                   | Cefepime                                                                          |                                                                                                                                                                                 | excellent gram neg including <i>Pseudomonas</i> ; poor activity vs. gram pos cocci; good CSF penetration                                                                                                                                                                                                                                                  | injection site reaction; GI intolerance; cytopenias; hypophosphatemia                                                                                                                                                                                                            |
| 5th gen                                                   | Ceftaroline                                                                       |                                                                                                                                                                                 | Staph aureus (including MRSA, VRSA, VISA); streptococci; <i>E. faecalis</i> ; Enterobacteriaceae (but NOT <i>Pseudomonas</i> )                                                                                                                                                                                                                            | GI intolerance; cytopenias; hypokalemia; pruritis                                                                                                                                                                                                                                |

| <u>Class</u>                                               | <u>Example(s)</u>                                          | <u>Mechanism of action</u>                                                                                                                                                                                                                      | <u>Spectrum</u>                                                                                                                                                                                        | <u>Side effects / Notes</u>                                                                                                                                                                                                                                    |
|------------------------------------------------------------|------------------------------------------------------------|-------------------------------------------------------------------------------------------------------------------------------------------------------------------------------------------------------------------------------------------------|--------------------------------------------------------------------------------------------------------------------------------------------------------------------------------------------------------|----------------------------------------------------------------------------------------------------------------------------------------------------------------------------------------------------------------------------------------------------------------|
| <b>MONOBACTAMS</b>                                         | Aztreonam                                                  | all beta lactam antibiotics bind penicillin-binding-proteins (PBP's) to inhibit bacterial cell wall synthesis<br><br>NOTE: antimicrobial effect depends on <i>time over MIC</i>                                                                 | gram neg <i>only</i> , including <i>Pseudomonas</i> (if not resistant); particularly for PCN-allergic patients                                                                                         | safe in patients with PCN allergy                                                                                                                                                                                                                              |
| <b>CARBAPENEMS</b>                                         | Imipenem-cilastatin<br>Meropenem<br>Ertapenem<br>Doripenem | all beta lactam antibiotics bind penicillin-binding-proteins (PBP's) to inhibit bacterial cell wall synthesis<br><br>NOTE: antimicrobial effect depends on <i>time over MIC</i>                                                                 | gram pos, neg and anaerobes; particularly useful for enterobacteriaceae with extended spectrum beta-lactamase (ESBL); note: ertapenem does NOT have activity vs. <i>Pseudomonas</i>                    | usually well-tolerated even in persons with reported PCN allergy<br><br>SE profile similar to PCN's: allergic reactions (often with eosinophilia), hepatitis, cytopenias, and seizures (especially with imipenem-cilastatin in setting of renal insufficiency) |
| <b>BETA-LACTAM / BETA-LACTAMASE INHIBITOR COMBINATIONS</b> | see below for each generation                              | bacteria produce beta-lactamases to break up the beta-lactam ring, thus rendering beta-lactam antibiotics ineffective; by adding a beta-lactamase inhibitor, these drugs restore the beta-lactam activity and extend the antimicrobial spectrum |                                                                                                                                                                                                        | SE profile similar to other beta-lactams: allergic reactions (often with eosinophilia), hepatitis, interstitial nephritis; cytopenias, and CNS toxicity (seizures) especially in setting of renal failure                                                      |
|                                                            | Amoxicillin-clavulanate                                    |                                                                                                                                                                                                                                                 | MSSA and beta-lactamase producing <i>H. flu</i>                                                                                                                                                        | rash (idiosyncratic with EBV)                                                                                                                                                                                                                                  |
|                                                            | Ampicillin-sulbactam                                       |                                                                                                                                                                                                                                                 | MSSA and beta-lactamase producing <i>H. flu</i> , anaerobes; <i>Acinetobacter</i>                                                                                                                      |                                                                                                                                                                                                                                                                |
|                                                            | Ticarcillin-clavulanate<br>Piperacillin-tazobactam         |                                                                                                                                                                                                                                                 | aerobic gram neg including <i>Pseudomonas</i>                                                                                                                                                          | high sodium content<br>platelet dysfunction                                                                                                                                                                                                                    |
|                                                            | Ceftolazone-tazobactam<br>Ceftazidime-avibactam            |                                                                                                                                                                                                                                                 | aerobic gram neg including <i>Pseudomonas</i> and most ESBL Enterobacteriaceae (complicated UTI / intra-abdominal infection)                                                                           | lower cure rates in patients with reduced GFR                                                                                                                                                                                                                  |
|                                                            | Meropenem-Vaborbactam                                      |                                                                                                                                                                                                                                                 | aerobic and anaerobic gram positives and negatives, including <i>Pseudomonas</i> , ESBL Enterobacteriaceae and some carbapenemase-producing gram negatives (such as KPC); approved for complicated UTI | injection site reaction; GI intolerance; elevation of liver function tests; hypokalemia; lowered seizure threshold                                                                                                                                             |

| Class                              | Example(s)                                                   | Mechanism of action                                                                                                              | Spectrum                                                                                                                                                                                                                                                                                                                                                                                       | Side effects / Notes                                                                                                                                                      |
|------------------------------------|--------------------------------------------------------------|----------------------------------------------------------------------------------------------------------------------------------|------------------------------------------------------------------------------------------------------------------------------------------------------------------------------------------------------------------------------------------------------------------------------------------------------------------------------------------------------------------------------------------------|---------------------------------------------------------------------------------------------------------------------------------------------------------------------------|
| <b>NON-BETA-LACTAM ANTIBIOTICS</b> |                                                              |                                                                                                                                  |                                                                                                                                                                                                                                                                                                                                                                                                |                                                                                                                                                                           |
| <b>QUINOLONES</b>                  | Ciprofloxacin<br>Levofloxacin<br>Moxifloxacin                | block DNA synthesis (via gyrase inhibition); note 100% bioavailability                                                           | spectrum varies by drug:<br>cipro - gram neg, including <i>Pseudomonas</i><br>levofloxacin - gram neg but also streptococci, atypical respiratory pathogens ( <i>Legionella</i> ; <i>Mycoplasma</i> )<br>moxifloxacin - gram neg including anaerobes, also streptococci, atypical respiratory pathogens, non-tuberculous mycobacteria                                                          | QT interval prolongation<br>tendinopathy / rupture                                                                                                                        |
| <b>AMINOGLYCOSIDES</b>             | Gentamicin<br>Tobramycin<br>Amikacin                         | inhibit protein synthesis (bind 30S ribosomal subunit); NOTE: <i>concentration-dependent</i> killing with post-antibiotic effect | aerobic gram neg bacilli, including <i>Pseudomonas</i> ; atypical mycobacteria; part of combination therapy for some forms of endocarditis (e.g. enterococcus, certain streptococci, prosthetic valve endocarditis)                                                                                                                                                                            | nephrotoxicity<br>ototoxicity (can be irreversible)                                                                                                                       |
| <b>TETRACYCLINES</b>               | Tetracycline<br>Doxycycline                                  | inhibit protein synthesis (bind 30S ribosomal subunit)                                                                           | atypical respiratory pathogens ( <i>Chlamydia</i> , <i>Mycoplasma</i> )<br>STI's (1st line for <i>Chlamydia</i> ; also gonorrhea and syphilis in PCN-allergic patients<br>multiple vector-borne diseases e.g. RMSF and other rickettsial infections, Lyme disease                                                                                                                              | GI upset<br>esophageal ulcerations (pill esophagitis)<br>photosensitivity<br>stains / deforms teeth in children                                                           |
| <b>GLYCYLCYCLINE</b>               | Tigecycline                                                  | inhibit protein synthesis (bind 30S ribosomal subunit)                                                                           | broad spectrum - MRSA, VRE, ESBL gram negatives, <i>C diff</i><br>however, side effects and poor blood levels limit utility (cannot use in bacteremia)                                                                                                                                                                                                                                         | nausea / vomiting<br>renal and liver toxicity<br>some reports of increased mortality with use                                                                             |
| <b>LINCOSAMIDES</b>                | Clindamycin                                                  | inhibit protein synthesis (bind 50S ribosomal subunit)                                                                           | gram positive aerobes (strep, staph including MRSA); anaerobes "above the belt" ( <i>Fusobacterium</i> ; <i>Prevotella</i> ; <i>Peptostreptococcus</i> )                                                                                                                                                                                                                                       | most likely to cause <i>C diff</i>                                                                                                                                        |
| <b>MACROLIDES</b>                  | Erythromycin (rarely used)<br>Azithromycin<br>Clarithromycin | inhibit protein synthesis (bind 50S ribosomal subunit)                                                                           | most upper respiratory pathogens ( <i>S. pneumo</i> , <i>moraxella</i> , <i>H. flu</i> ) and atypical PNA pathogens ( <i>Legionella</i> , <i>Chlamydia</i> , <i>Mycoplasma</i> ); some gram negative rods such as causes of traveler's diarrhea ( <i>E. coli</i> , <i>Shigella</i> ); STI's ( <i>N. gonorrhea</i> ; <i>Chlamydia</i> ); part of treatment for atypical mycobacteria (e.g. MAC) | GI intolerance<br>QT prolongation (one study with increased risk of CV death)                                                                                             |
| <b>NITROIMIDAZOLES</b>             | Metronidazole                                                | disrupts host cell DNA                                                                                                           | anaerobes "below the belt" (bacterial vaginosis; <i>Bacteroides</i> ; <i>Clostridium</i> including <i>C diff</i> ); <i>Trichomonas</i>                                                                                                                                                                                                                                                         | GI intolerance (common)<br>Disulfiram-like reaction with ETOH<br>CNS effects (neuropathy, encephalopathy, tremors)                                                        |
| <b>OXAZOLIDINONES</b>              | Linezolid<br>Tedizolid                                       | inhibit protein synthesis (bind 50S ribosomal subunit)                                                                           | gram positives, including MRSA, MSSA, strep, enterococcus including VRE                                                                                                                                                                                                                                                                                                                        | bone marrow suppression (especially anemia and thrombocytopenia)<br>serotonin syndrome (if given with SSRI)<br>lactic acidosis<br>optic neuritis or peripheral neuropathy |

| <u>Class</u>               | <u>Example(s)</u>                     | <u>Mechanism of action</u>                                                                            | <u>Spectrum</u>                                                                                                                                                                                                                                                  | <u>Side effects / Notes</u>                                                                                                                                                                                                                                                             |
|----------------------------|---------------------------------------|-------------------------------------------------------------------------------------------------------|------------------------------------------------------------------------------------------------------------------------------------------------------------------------------------------------------------------------------------------------------------------|-----------------------------------------------------------------------------------------------------------------------------------------------------------------------------------------------------------------------------------------------------------------------------------------|
| <b>GLYCOPEPTIDE</b>        | Vancomycin                            | inhibits bacterial cell wall synthesis by binding D-ala-D-ala                                         | gram positives, including MRSA, vanc-S enterococcus; <i>C diff</i> (with oral administration)<br>NOTE - inferior to anti-staph PCN for treatment of MSSA                                                                                                         | Red man syndrome (note - NOT an allergy; improves with prolonged infusion)<br>phlebitis<br>renal dysfunction<br>allergic reaction with rash<br>neutropenia, thrombocytopenia                                                                                                            |
| <b>CYCLIC LIPOPEPTIDES</b> | Daptomycin                            | binds bacterial membrane causing depolarization of membrane potential and cell death                  | gram positives, including MSSA, MRSA, VRE                                                                                                                                                                                                                        | elevated CPK and/or myopathy (d/c statins during therapy)<br>elevated LFT's<br>eosinophilic pneumonia                                                                                                                                                                                   |
| <b>POLYMYXINS</b>          | Colistin (Polymyxin E)<br>Polymyxin B | disrupts cell membrane                                                                                | reserved for treatment of resistant gram negatives due to toxicities<br>NOTE: dosing is complex and depends on formulation                                                                                                                                       | nephrotoxicity<br>neurotoxicity (paresthesia, vertigo, visual problems)                                                                                                                                                                                                                 |
| <b>RIFAMYCINS</b>          | Rifampin<br>Rifabutin                 | inhibit bacterial DNA-dependent RNA polymerase                                                        | tuberculosis and non-tuberculous mycobacteria<br>adjunctive therapy for some forms of staphylococcal endocarditis or infections involving a biofilm (e.g. prosthetic joint infections)<br>should not be used as monotherapy due to rapid emergence of resistance | many drug interactions as revs up P450 system<br>causes red-orange discoloration of body fluids<br>hepatitis                                                                                                                                                                            |
| <b>SULFONAMIDES</b>        | Trimethoprim-Sulfamethoxazole         | inhibits enzymes along bacterial folic acid pathway                                                   | broad spectrum including Staph (MRSA and MSSA); gram negatives especially in treatment of UTI; PCP and Toxoplasmosis; <i>Nocardia</i> ; <i>Listeria</i> ; non-tuberculous mycobacteria                                                                           | rash (including severe reactions e.g. SJS)<br>GI intolerance<br>elevated Cr (due to decreased secretion of Cr)<br>hyperkalemia, possible Type IV RTA<br>bone marrow suppression<br>hemolysis and/or methemoglobinemia in patients with G6PD deficiency<br>hepatitis (often cholestatic) |
| <b>SULFONES</b>            | Dapsone                               | inhibits enzymes along bacterial folic acid pathway                                                   | Leprosy; PCP and Toxoplasmosis                                                                                                                                                                                                                                   | rash (including severe reactions e.g. SJS)<br>hepatitis<br>blood dyscrasias including methemoglobinemia (with or without G6PD deficiency)                                                                                                                                               |
| <b>NITROFURANTOIN</b>      | Nitrofurantoin                        | bacterial flavoproteins metabolize the drug to reactive intermediates that disrupt ribosomal proteins | UTI pathogens ( <i>E. coli</i> , <i>Staph saprophyticus</i> , <i>E. faecalis</i> , some <i>Enterobacter sp.</i> )<br>NOTE: drug is inactivated by most body tissues, so only effective in urinary tract                                                          | acute hypersensitivity with pulmonary symptoms / infiltrates<br>Pulmonary fibrosis with long-term use<br>hemolysis and methemoglobinemia with G6PD deficiency<br>Neuropathy<br>Lupus-like reaction                                                                                      |

| Class                | Example(s)                                                                                                                    | Mechanism of action                                                                     | Spectrum                                                                                                                                                                                                                                                                                                                                                                                                                                                                                                                                                                                                                                                                  | Side effects / Notes                                                                                                                                                                                                                                                                                                                                                                                                                                                                                                                                                   |
|----------------------|-------------------------------------------------------------------------------------------------------------------------------|-----------------------------------------------------------------------------------------|---------------------------------------------------------------------------------------------------------------------------------------------------------------------------------------------------------------------------------------------------------------------------------------------------------------------------------------------------------------------------------------------------------------------------------------------------------------------------------------------------------------------------------------------------------------------------------------------------------------------------------------------------------------------------|------------------------------------------------------------------------------------------------------------------------------------------------------------------------------------------------------------------------------------------------------------------------------------------------------------------------------------------------------------------------------------------------------------------------------------------------------------------------------------------------------------------------------------------------------------------------|
| <b>ANTI-FUNGALS</b>  |                                                                                                                               |                                                                                         |                                                                                                                                                                                                                                                                                                                                                                                                                                                                                                                                                                                                                                                                           |                                                                                                                                                                                                                                                                                                                                                                                                                                                                                                                                                                        |
| <b>POLYENES</b>      | Amphotericin B (deoxycholate B; lipid formulations)<br>Nystatin                                                               | bind sterols of fungal cell wall leading to leakage of cellular contents and cell death | <b>Amphotericin:</b> very broad antifungal spectrum<br><b>Nystatin:</b> limited to oral / topical use for <i>Candida</i> infections                                                                                                                                                                                                                                                                                                                                                                                                                                                                                                                                       | <b>Amphotericin:</b><br>"shake and bake" infusion reaction with chills, rigors (seen with older formulation - amphotericin B deoxycholate)<br>nephrotoxicity and electrolyte disturbances (less common with lipid formulations)<br><b>Nystatin:</b> GI / skin irritation                                                                                                                                                                                                                                                                                               |
| <b>ECHINOCANDINS</b> | Caspofungin<br>Micafungin<br>Anidulafungin                                                                                    | block fungal cell wall synthesis by inhibiting beta-D-glucan synthesis                  | <i>Candidas spp.</i> (including most azole-resistant strains)<br><i>Aspergillus</i><br>NOTE: not effective against <i>Cryptococcus sp.</i> or Mucorales                                                                                                                                                                                                                                                                                                                                                                                                                                                                                                                   | generally very well tolerated<br>hepatotoxicity but typically asymptomatic elevation of LFT's                                                                                                                                                                                                                                                                                                                                                                                                                                                                          |
| <b>AZOLES</b>        | Triazoles:<br>Fluconazole<br>Itraconazole<br>Voriconazole<br>Posaconazole<br>Isavuconazole<br><br>Imidazoles:<br>Ketoconazole | block fungal cell wall synthesis by inhibiting ergosterol synthesis                     | Vary by drug<br><b>Fluconazole:</b> active against yeasts including <i>Candida</i> ; <i>Cryptococcus</i> ; NOT effective against molds<br><b>Itraconazole:</b> fairly broad spectrum including treatment of endemic fungi, but use limited by inconsistent bioavailability<br><b>Voriconazole:</b> <i>Aspergillus</i> and other resistant molds ( <i>Scedosporium</i> ; <i>Fusarium</i> ); fluconazole-resistant <i>Candida</i> ( <i>C. glabrata</i> ; <i>C. krusei</i> )<br><b>Posaconazole and Isavuconazole:</b> similar to voriconazole but with addition of activity against Mucorales<br><br><b>Ketoconazole:</b> rarely used due to SE profile / drug interactions | All: hepatotoxicity<br><br>Drug specific:<br><b>Fluconazole:</b> dry skin, alopecia; renal toxicity<br><b>Itraconazole:</b> requires food and acidic gastric pH for absorption (tell patients to drink a Coke); cardiac dysfunction<br><b>Voriconazole:</b> vision changes / hallucinations; photosensitivity; QT prolongation; periostitis (with elevation in serum fluoride levels)<br><b>Posaconazole:</b> QT prolongation<br><b>Isavuconazole:</b> GI intolerance; peripheral edema; <i>shortens</i> QT interval<br><br><b>Ketoconazole:</b> adrenal insufficiency |
